# Supplementary material for: Quasi-seeded growth, phase transformation, and size tuning of multifunctional hexagonal NaLnF4(Ln = Y, Gd, Yb) nanocrystalsvia in situcation-exchange reaction
Source: Royal Society of Chemistry journal article supplement (doi:10.1039/c1jm14425a), 2011-12-16
Supplement: c1jm14425a.pdf [file c1jm14425a.pdf]

## Electronic Supplementary Information

### Quasi-seeded growth, phase transformation, and size tuning of multifunctional hexagonal NaLnF<sub>4</sub> (Ln=Y, Gd, Yb) nanocrystals via *in situ* cation-exchange reaction

L.W. Yang<sup>1,2\*</sup>, Y. Li, Y. C. Li<sup>1</sup>, J. J. Li<sup>1</sup>, J. H. Hao<sup>2\*</sup>, J. X. Zhong<sup>1</sup>, P. K. Chu<sup>3\*</sup>

<sup>1</sup>*Laboratory for Quantum Engineering and Micro-Nano Energy Technology and  
Faculty of Materials and Optoelectronic Physics, Xiangtan University, Hunan 411105,  
China*

<sup>2</sup>*Department of Applied Physics, The Hong Kong Polytechnic University, Hong Kong,  
China*

<sup>3</sup>*Department of Physics and Materials Science, City University of Hong Kong, Tat  
Chee Avenue, Kowloon, Hong Kong, China*

---

\*Corresponding authors: [ylwxtu@xtu.edu.cn](mailto:ylwxtu@xtu.edu.cn); [apjhao@polyu.edu.hk](mailto:apjhao@polyu.edu.hk);  
[paul.chu@cityu.edu.hk](mailto:paul.chu@cityu.edu.hk)

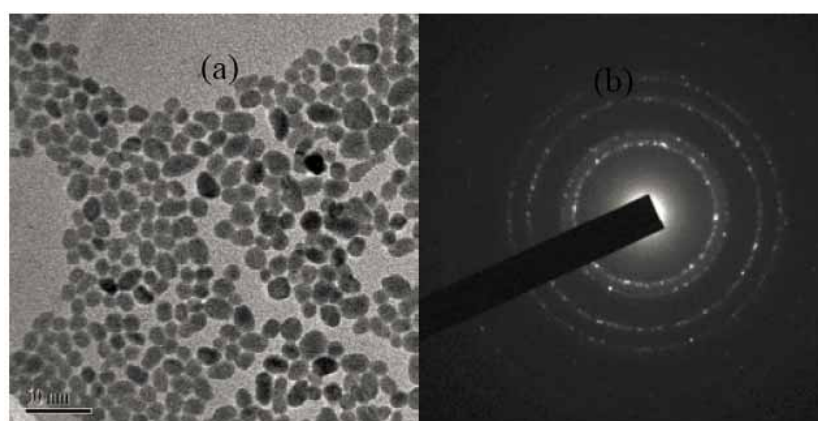

Figure S1 (a) and (b) Typical TEM image and selected electron diffraction (SEAD) pattern of the  $\text{KYb}_{0.1}\text{Gd}_{0.9}\text{F}_4$  NCs.

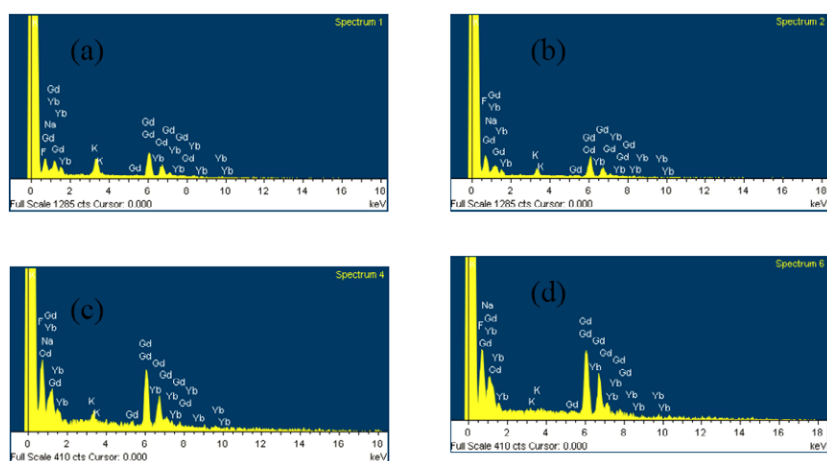

Figure S2 (a)-(d) EDS spectra taken from the oleate-capped cubic  $\text{KYb}_{0.1}\text{Gd}_{0.9}\text{F}_4$  NCs reacted with 10mol% NaOA at  $180^\circ\text{C}$  for different time of 0 h, 2 h, 5 h, and 20 h, respectively.

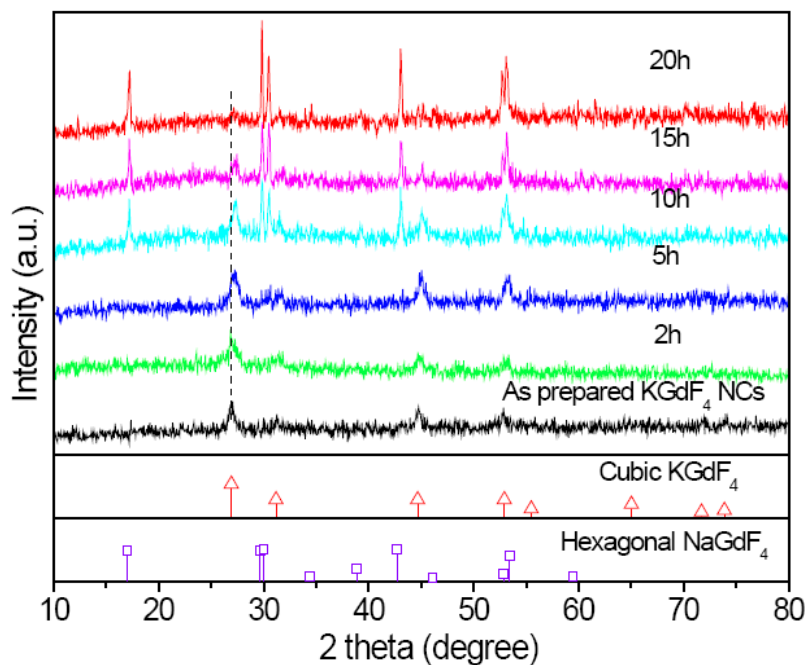

Figure S3 XRD patterns of the oleate-capped cubic  $\text{KYb}_{0.1}\text{Gd}_{0.9}\text{F}_4$  NCs reacted with 10mol% NaOA at 180°C for different times. The data of cubic  $\text{KGdF}_4$  and hexagonal  $\text{NaGdF}_4$  are resourced from Ref. 1 and standard XRD card (JCPDS NO. 27-0699)

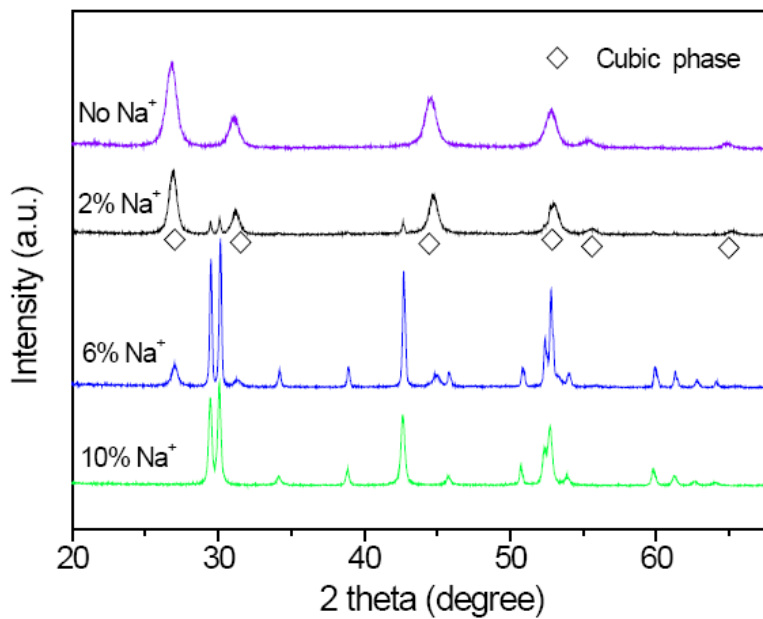

Figure S4 XRD patterns of the samples synthesized at 180°C for 20 h using precursors containing K, Na, Yb(10 mol%), Gd(90 mol%) and F with potassium: sodium molar ratios of 100: 0, 98: 2, 94:6 and 90: 10. Diffraction peaks corresponding to cubic phase are marked with diamond symbol.

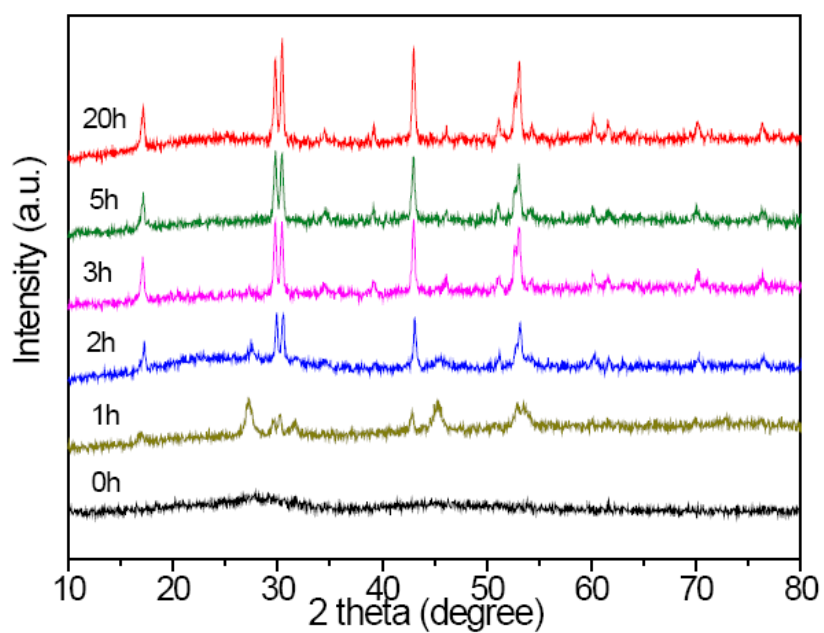

Figure S5 XRD patterns of the NaYb<sub>0.1</sub>Gd<sub>0.9</sub>F<sub>4</sub> samples synthesized for different time durations at 180 °C using precursors with a potassium: sodium molar ratio of 90:10.

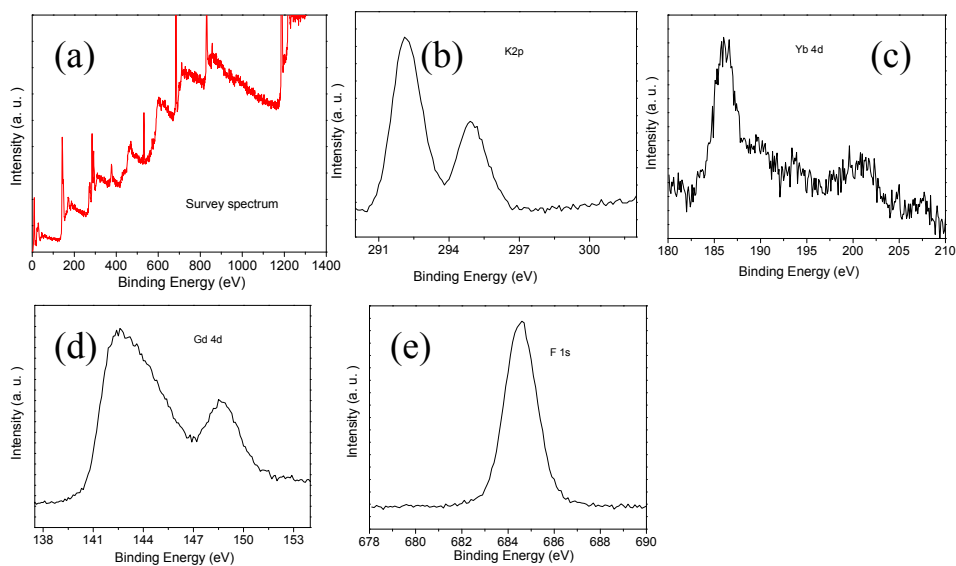

Figure S6 (a) Survey spectrum of the  $\text{KYb}_{0.1}\text{Gd}_{0.9}\text{F}_4$  NCs synthesized at 180 °C. (b)-(e) the corresponding K 2p, Yb 4d, Gd 4d, F 1s XPS spectra, respectively. The C 1s peak is used as the reference.

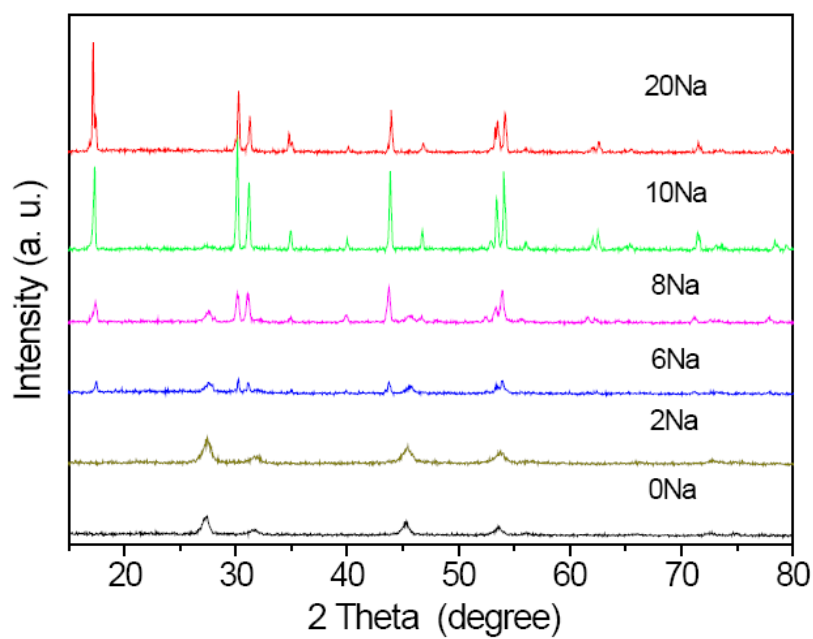

Figure S7 XRD patterns of the samples synthesized at 190 °C for 20h with different potassium: sodium molar ratios using precursors containing K, Na, Y, and F.



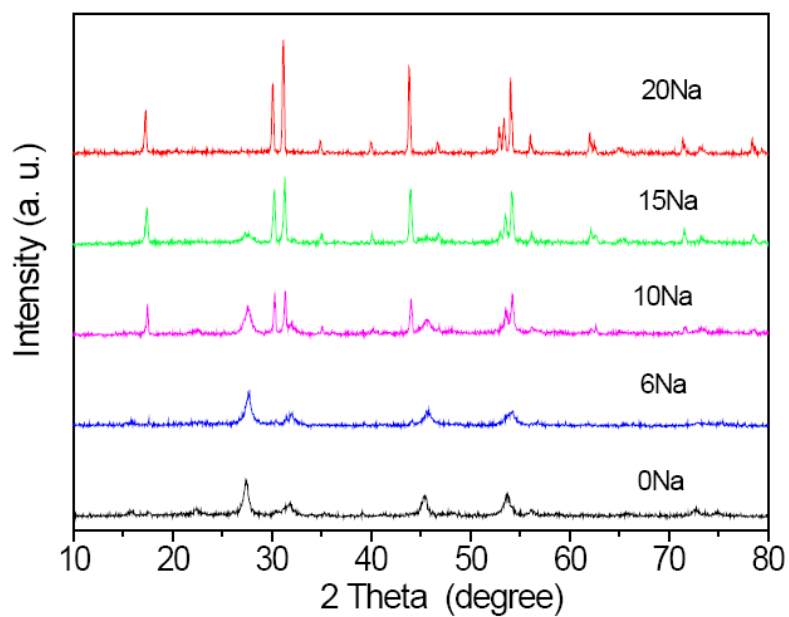

Figure S8 XRD patterns of the samples synthesized at 190 °C for 20h with different potassium: sodium molar ratios using precursors containing K, Na, Yb, and F.

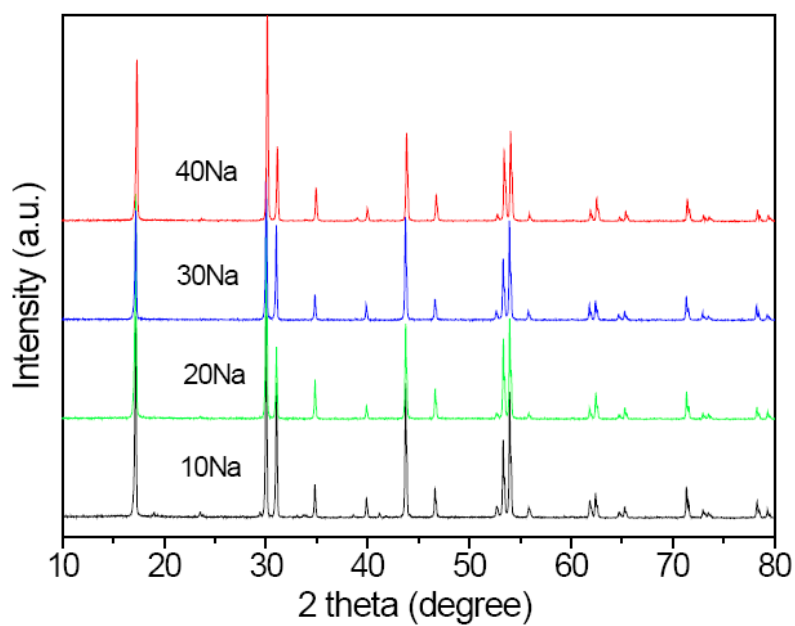

Figure S9 XRD patterns of the samples synthesized at 210 °C for 20h with different potassium: sodium molar ratios using precursors containing K, Na, Yb, and F.

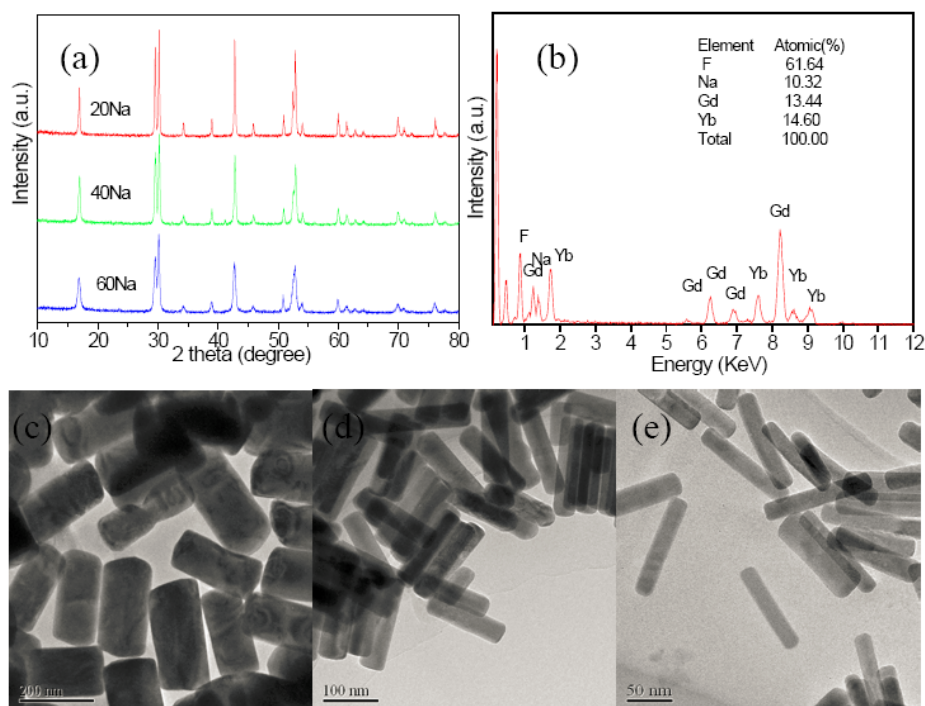

Figure S10 (a) XRD patterns of the samples synthesized at 210 °C for 20 h using precursors containing K, Na, 45mol% Gd,55mol%Yb and F with different potassium: sodium molar ratios of 80:20, 60:40 and 40:60, respectively. (b)EDS spectrum of the sample synthesized at 210 °C for 20h with potassium: sodium molar ratio of 20:80 using precursors containing K, Na, 45mol% Gd, 55mol%Yb and F. No signals from K are detected. (c)-(f) Typical TEM images of the samples synthesized for 20h at 210 °C using precursors containing K, Na, 45mol% Gd,55mol%Yb and F with different potassium: sodium molar ratios of 80:20, 60:40 and 40:60, respectively.

## Reference

1. L. W. Yang, Y. Y. Zhang, J. J. Li, Y. Li, J. X. Zhong and P. K. Chu, *Nanoscale*, 2010, **2**, 2805-2810.
